1 BIOLOGICAL SCIENCES, Population Biology & Agricultural Sciences

2 **Title: A resurrection experiment finds evidence of both reduced genetic diversity and**  
3 **adaptive evolution in the agricultural weed *Ipomoea purpurea***

4 Short title: Adaptive evolution in an agricultural weed

5 Authors: Adam Kuester<sup>1</sup>, Ariana Wilson<sup>1</sup>, Shu-Mei Chang<sup>2</sup>, and Regina S. Baucom<sup>1\*</sup>

6

7 <sup>1</sup>2059 Kraus Natural Science Building

8 Department of Ecology and Evolutionary Biology

9 830 North University

10 University of Michigan

11 Ann Arbor, Michigan, 48109

12 Phone: 1 (734) 647-8490

13 Fax: 1 (734) 763-0544

14 <sup>2</sup>2502 Plant Sciences Building

15 Plant Biology Department

16 University of Georgia

17 120 Carlton Street

18 Athens, GA 30602

19

20 *\*Corresponding author*

21

22 Email Addresses:

23 AK: [kuesteam@umich.edu](mailto:kuesteam@umich.edu)

24 SMC: [smchang@uga.edu](mailto:smchang@uga.edu)

25 RSB: [rsbaucom@umich.edu](mailto:rsbaucom@umich.edu)

26

27 Article type: Original Research article

28

29 **Keywords:** agriculture, allelic diversity, selection, genetic drift, temporal evolution

30 This article contains supporting information online at: xxx.

31

32

### 33 **Abstract**

34 Despite the negative economic and ecological impact of weeds, relatively little is known about  
35 the evolutionary mechanisms that influence their ability to persist and thrive in agricultural  
36 fields. Here, we use a resurrection ecology approach and compare the neutral and adaptive  
37 genetic variation of temporally sampled seed progenies of *Ipomoea purpurea*, an agricultural  
38 weed that is resistant to glyphosate, the most widely used herbicide in current-day agriculture.  
39 We found striking reductions in allelic diversity between cohorts sampled nine years apart,  
40 suggesting that populations of this species sampled from agricultural fields experience genetic  
41 bottleneck and/or founder events through time. We further found that populations of this species  
42 exhibit modest increases in herbicide resistance over time and evidence that this increase was  
43 due to adaptation and not genetic drift. Our results show that even in light of reduced genetic  
44 variation, populations of this noxious weed are capable of adapting to strong selection imparted  
45 by herbicide application. We likely uncovered only modest increases in resistance between  
46 sampling cohorts due to a strong and previously identified fitness cost of resistance in this  
47 species, along with the potential that non-resistant migrants germinate from the seed bank.

### 48 **Significance Statement**

49 Although weedy plant species cause significant worldwide declines in crop production, we have  
50 a limited understanding of the evolutionary forces that influence their population dynamics. Here  
51 we use a novel “resurrection ecology” experiment and examine how both neutral and adaptive  
52 genetic diversity change over a nine-year period in the common morning glory, a noxious  
53 agricultural weed. By germinating stored seeds and performing genetic diversity and common  
54 garden assays we found consistent and striking declines in diversity through time, along with  
55 evidence that resistance to the herbicide glyphosate has increased. Our data indicate that weedy  
56 plant species are capable of adapting to agricultural regimes even as they experience genetic  
57 bottleneck.

### 58 **Introduction**

59 The influence of human mediated selection is perhaps nowhere more prevalent than in  
60 the agricultural system. Agricultural weeds, in particular, provide excellent case studies of  
61 adaptation to human-mediated selection (1). They are exposed to fertilizers, herbicides,  
62 irrigation, as well as variable cropping techniques, and these manipulations can impose frequent,  
63 strong, and highly predictable disturbance regimes (2). Examples of adaptation to these scenarios  
64 are present in the literature from early cases of crop mimicry (1) to the many recent examples of  
65 the evolution of herbicide resistance (2). Given the extreme selection that weedy plants may  
66 experience in agricultural fields, a central and unanswered question remains: How have many  
67 weed species managed to not only adapt to such environments, but also to thrive in them?

68 These lapses in our understanding of weed evolution are striking because the population  
69 dynamics of agricultural weeds are directly relevant to the global food supply. Agricultural weed  
70 infestations reduce world-wide crop production by as much as 10% (3), and it has been estimated  
71 that crop losses caused by weeds cost the US agricultural economy as much as 33B per year (4).  
72 Clarifying the evolutionary forces that impact agricultural weeds can provide information on the

73 process of evolution more broadly as well as insight on how weeds survive and thrive in  
74 agricultural regimes.

75 Because humans do not intentionally or directly select upon weeds, they are subject to the  
76 same forces influencing evolution in nature—notably, genetic drift, selection, and gene flow (5).  
77 The difference between natural systems and human-manipulated landscapes is in both the  
78 intensity and predictability of selection. For example, the predominant form of weed control in  
79 current farming is through the use of herbicides, which are designed to remove 90% of the weed  
80 population (6). Individuals that survive due to either chance or genetic predisposition are  
81 founders for the next generation. Since the point of weedy plant control regimes—whether  
82 through the use of herbicide or another control technique—is to remove of a large portion of the  
83 population, populations that re-colonize are likely to show a pattern of constriction and genetic  
84 bottleneck (6). Further, as a result of the bottleneck process weeds could lose rare alleles  
85 important to future adaptation (7).

86 In support of this idea, population genetic surveys have found that weeds tend to exhibit  
87 less genetic variation than other groups of plants (8), and there is some evidence that weed  
88 populations from cultivated land exhibit both decreased neutral genetic diversity and alterations  
89 in quantitative traits compared to wild populations (12). The majority of the work to date,  
90 however, has compared populations across space, *i.e.*, from cultivated and non-cultivated areas  
91 (9), or “wild” versus “weedy” populations (10). In contrast, a novel approach that can provide  
92 direct evidence for evolutionary change through time is by the use of “resurrection ecology” in  
93 which ancestor and descendant strains of species are compared. In this type of experiment, seeds  
94 or propagules sampled from an earlier time point are germinated after remaining dormant for a  
95 number of years and compared to descendant populations sampled from the same location (11).  
96 Although resurrection ecology experiments have been used to address key questions on  
97 evolutionary constraints in microbial systems (12), such experiments in eukaryotes have thus far  
98 used either a limited number of accessions (13) or a limited number of distinct populations (14,  
99 15).

100 Here we perform a resurrection ecology experiment to examine the population genetics  
101 and potential adaptability of *Ipomoea purpurea*, the common morning glory. This species is a  
102 noxious agricultural weed of corn, cotton and soy crops in the United States as well as a model  
103 plant in ecological genetics (16). It is an opportunistic colonizer of disturbed habitats and is  
104 found primarily in agricultural fields in the southeastern and Midwestern US. *I. purpurea*  
105 exhibits variability in resistance to glyphosate, which is the main ingredient in the herbicide  
106 RoundUp, the most utilized herbicide in agriculture world-wide (17). Previous work has found  
107 that an additive genetic basis underlies glyphosate resistance in this species (18). More recently  
108 we have uncovered evidence of a mosaic of herbicide resistance across the US, with some  
109 populations exhibiting high resistance and others showing high susceptibility post-herbicide  
110 application (19). Because seeds of *I. purpurea* remain viable for many years in lab conditions,  
111 we are able to examine both neutral and adaptive genetic variation of populations sampled from  
112 the same agricultural fields at two different time points—once in 2003 and again in 2012 (see  
113 Figure 1 for population locations). We first determine if the neutral genetic differentiation and

114 diversity of *I. purpurea* populations have changed between sampling years. We pair this with  
115 greenhouse experiments to examine the potential that these populations, sampled from the same  
116 fields that were used for either soy or corn farms between 2003 and 2012 (Table S1) exhibit  
117 evidence of adaptive change in plant size and herbicide resistance traits. We find evidence of  
118 both genetic bottleneck and adaptive evolution for a key herbicide resistance trait, indicating that  
119 a noxious weed can adapt to the extreme selection imposed by herbicide applications even as  
120 genetic diversity decreases. This is the first examination, to our knowledge, of a resurrection  
121 ecology experiment that simultaneously identifies both loss of genetic diversity of an agricultural  
122 weed over time as well as evidence for adaptive evolution.

## 123 **Results**

124 **Genetic diversity and differentiation.** We uncovered striking reductions in genetic diversity  
125 between sampling years among populations (Table 1), with most measures of diversity  
126 significantly reduced in 2012 compared to 2003 (Figure 2). For example, expected  
127 heterozygosity was 32% lower in 2012 ( $W = 51$ ,  $P = 0.01$ ), allelic richness was 18% lower ( $W =$   
128  $52$ ,  $P = 0.01$ ), the effective number of alleles was 43% lower ( $W = 51$ ,  $P = 0.01$ ) and the absolute  
129 number of alleles per locus were reduced by 19% in 2012 compared to 2003 ( $W = 50$ ,  $P = 0.01$ ).  
130 Interestingly, the observed heterozygosity was 27% higher, on average, in 2012 compared to  
131 2003 ( $W = 4$ ,  $P = 0.005$ ). This difference is likely due to the low observed compared to expected  
132 heterozygosity of the 2003 cohort, *i.e.*, the fixation index ( $F = H_e - H_o / H_e$ ) was higher in 2003  
133 versus 2012 ( $F_{2003} = 0.53 \pm 0.04$  vs.  $F_{2012} = 0.17 \pm 0.05$ , respectively). Although this difference  
134 could be due to selection against heterozygotes in 2003, it is more likely indicative of differences  
135 in the mating system between sampling years of this mixed-mating, hermaphroditic species.  
136 Populations were sampled during a longer window of time in 2003 than in 2012 (10/10-11/3 in  
137 2003 vs 10/15-10/20 in 2012); however, at least five of the 10 populations were sampled during  
138 the same temporal window (10/10-10/20 both years), and these populations still exhibit  
139 differences in  $F$  values ( $F_{2003} = 0.46 \pm 0.08$  vs.  $F_{2012} = 0.11 \pm 0.03$ ). We do not have information  
140 regarding pollinator abundance or any other reason to expect differences in the mating system  
141 between years and thus cannot explain this pattern. HWE tests, consequently, indicated that more  
142 loci were not in HWE equilibrium within populations in 2003 (86 out of 150 loci  $\times$  population  
143 combinations), compared to 2012 (24 out of 150).

144 Alternatively, increased heterozygosity in bottlenecked versus source populations could  
145 be due to random drift leading to an increase in the frequency of formally rare alleles (20); such  
146 changes can subsequently lead to higher observed heterozygosity in bottlenecked populations  
147 relative to their source populations (21). We thus examined changes in the patterns of allelic  
148 diversity by investigating the number of alleles, the number of rare alleles (<10% frequency) and  
149 the frequency of rare alleles present in 2003 and 2012. At the species level (*i.e.*, across all  
150 populations), we found no evidence for a reduction in the total number of alleles from 2003 to  
151 2012 (42 versus 44 alleles in each year, respectively)—unexpectedly, we found fewer rare alleles  
152 in 2003 than 2012 (10 vs 17). Only four of the rare alleles present in 2003 were likewise present  
153 in 2012, and their frequency was not dramatically increased as would be expected if rare allele  
154 frequency changes were responsible for the higher observed heterozygosity in 2012. When

155 examining the number of alleles per population, however, we found that the total number of  
156 alleles was reduced in eight of 10 populations, by as much as 12-40% across populations. Two of  
157 the ten populations (populations 26 and 28) exhibited gains of low frequency alleles (between 4-  
158 5 new alleles present in 2012 at frequencies of <10%). Thus, 8 of the 10 populations show  
159 reductions in diversity over time likely due to random genetic drift, whereas two of the  
160 populations exhibit an increase in the number of alleles, putatively due to migration from other  
161 sources. Finally, bottleneck tests using either the signed, Wilcoxon or standard differences test  
162 for an infinite allele model indicated that between 2-5 populations, depending on the test, from  
163 the 2012 seed cohort experienced bottleneck (Table S2). We did not perform bottleneck tests  
164 using the 2003 cohort since such tests are sensitive to deviations from HWE.

165 We next estimated the effective number of individuals from each sampling year using  
166 expected heterozygosity and the equation  $H_e = 4N_e\mu$  (22) with a mutation rate,  $\mu$ , of  $10^{-3}$  (23).  
167 We found the estimated number of individuals from the 2003 populations was significantly  
168 higher, on average, compared to that of the 2012 populations ( $N_{e, 2003} = 85$ ,  $N_{e, 2012} = 58$ ;  $W = 67$ ,  
169  $P = 0.005$ ). Furthermore, we found no significant difference between our census sample size  
170 from the 2012 populations and the estimated effective number of individuals from that sampling  
171 year (Population size average from census = 70 individuals;  $W = 36.5$ ,  $P = 0.32$ ). While the  
172 difference in estimated number of individuals between sampling years indicated that most  
173 populations experienced reductions in size (reductions ranging from 20-55 individuals fewer in  
174 2012), populations 26 and 28 both exhibited an estimated gain of 20 individuals.

175 In line with lower diversity of the majority of populations, we found significant genetic  
176 differentiation between individuals sampled from different collection years (AMOVA year  
177 effect,  $F_{RT} = 0.306$ ,  $P = 0.001$ , Table S3), and evidence that individuals sampled as seed in 2003  
178 were more similar to one another than to individuals sampled as seed from the same location in  
179 2012 (Figure 3), *i.e.*, no individual assigned to 2003 was likewise assigned to 2012. Populations  
180 sampled in 2003 exhibited lower estimates of genetic differentiation than the same populations  
181 collected in 2012 ( $F_{ST2003} = 0.113$ ,  $P < 0.001$ ;  $F_{ST2012} = 0.309$ ,  $P < 0.001$ ), supporting the idea that  
182 the populations sampled in 2003 experienced a bottleneck leading to greater genetic divergence  
183 in 2012.

184 **Trait divergence.** We examined resistance traits (survival and biomass post-herbicide  
185 application), and plant size traits (height and number of leaves) from two separate experiments—  
186 one screening for resistance and another for plant growth—to determine if there was evidence of  
187 adaptive trait differentiation between sampling years. Our mixed-effects analyses of variance  
188 uncovered a significant year effect for biomass remaining after herbicide application ( $F_{1, 3595} =$   
189  $4.72$ ,  $P = 0.03$ ; Table S4). On average across all populations, the biomass remaining post-spray  
190 of the 2012 cohort was slightly greater than that of the 2003 cohort (62% vs. 57% in 2012 and  
191 2003, respectively) suggesting moderate increases in resistance across populations sampled in  
192 2012 (see Table S5 for averages ( $\pm$ SE) among all populations). Likewise, a higher percentage of  
193 individuals sampled in 2012 survived herbicide application compared to those sampled from  
194 2003 (49% vs 42%), but this difference was not significant ( $F_{1, 5365} = 2.58$ ,  $P = 0.11$ ; Table S4).

195 As in previous work (19), we identified significant population effects for both measures of  
196 resistance (Table S4), indicating that populations vary across the landscape for their relative level  
197 of herbicide resistance. Here, however, we also find population by year effects in each analysis,  
198 indicating that populations differ in their level of resistance across years (Survival,  $\chi^2 = 23.74$ ,  $P$   
199  $< 0.001$ ; Biomass,  $\chi^2 = 7.92$ ,  $P = 0.005$ ; Table S4). One population's survival increased by 79%  
200 compared to 2003, indicating that some populations may respond more readily with increased  
201 resistance than others. In general, three populations sampled from TN that were highly resistant  
202 in 2012 (19) were similarly resistant in 2003 (Figure 1 A & B, shown at 2X field rate of  
203 RoundUp). The majority of the significant increases identified in the 2012 cohort compared to  
204 the 2003 cohort were located in NC and SC (Figure 1 A & B)—while five populations from the  
205 2012 cohort of this region exhibit resistance values significantly greater than the species-wide  
206 average (56% survival at 2X the field rate of RoundUp; (19)), the 2003 cohorts of these  
207 populations exhibited only ~14% survival at 2X field rate.

208 Although we found evidence for differences in resistance traits between years, we found  
209 no significant differences in the size of the plants sampled from 2012 compared to 2003. The  
210 height of the plants and the number of leaves were both approximately the same, on average,  
211 between sampling years (105 vs 102 cm and 8.8 vs 8.8 leaves, 2003 vs 2012, respectively; see  
212 Table S4).

213 **Adaptive evolution.** We next conducted a  $P_{CT-FCT}$  (*i.e.*, Pseudo  $Q_{ST-FST}$ ; (24)) analysis modified  
214 from Duncan and Rausher (25) to determine if the moderate increase in resistance in 2012 (*i.e.*,  
215 increased biomass remaining after herbicide) was consistent with neutral divergence or due to  
216 adaptive evolution over time. We performed the analysis for biomass after herbicide application  
217 since this was the only trait that exhibited a significant effect of year. This analysis is a  
218 hierarchical extension to typical  $Q_{ST-FST}$  analyses in that the variance components of year and  
219 population nested within year are included, and it is considered a “Pseudo  $Q_{ST}$ ” since we are  
220 utilizing population variation rather than a half- or full-sib design. If  $P_{CT} > F_{CT}$ ,  
221 positive/directional selection would be inferred as the reason for trait divergence among years  
222 whereas the data are consistent with genetic drift if  $P_{CT} = F_{CT}$ . In contrast, if  $P_{CT} < F_{CT}$ , we would  
223 conclude that the trait is subject to stabilizing or uniform selection across years. We found that  
224 the  $P_{CT}$  value for biomass remaining after herbicide application was greater than and strongly  
225 differentiated from the  $F_{CT}$  value (Figure 4), *e.g.*, the distribution of bootstrap values of  $F_{CT}$  ( $F_{CT}$   
226 = 0.30, 95% CI: 0.24-0.35) did not overlap the  $P_{CT}$  distribution ( $P_{CT} = 0.71$ , 95% CI: 0.37-0.88).  
227 Thus, the increase in resistance identified between sampling cohorts is consistent with a scenario  
228 of adaptive evolution rather than due to neutral processes such as drift.

229

## 230 Discussion

231 Despite the ubiquity and persistence of weedy plant populations, there are few  
232 examinations of how their neutral and adaptive genetic diversity may change over time. Here we  
233 use a resurrection ecology experiment to show that populations of weedy *I. purpurea* sampled  
234 from crop fields concomitantly lose genetic diversity and show signs of adaptive evolution in an

235 herbicide resistance trait. Our experiments yielded three novel findings. First, we found that seed  
236 progenies from populations sampled in 2012 exhibited lower genetic diversity and higher genetic  
237 differentiation than seed progenies sampled from the same fields and locations in 2003. Second,  
238 in addition to finding population variation for resistance traits, we found that a key resistance  
239 trait—the amount of biomass maintained following herbicide application—has increased from  
240 2003 to 2012. Third, a hierarchical examination of adaptive and neutral genetic variation, which  
241 included the variance due to collection year, showed a pattern of  $P_{CT} > F_{CT}$  for biomass  
242 remaining after herbicide, suggesting that the increase in resistance we detected between 2003  
243 and 2012 was the result of adaptive evolution and not genetic drift.

244 Previous examinations of agricultural weed populations compared to wild populations  
245 have either failed to uncover substantial reductions in genome-wide diversity (10) or have  
246 presented largely circumstantial evidence for bottlenecks (i.e., comparisons between species;  
247 (8)). The significant loss in diversity that we uncovered across populations of *I. purpurea*  
248 sampled from agricultural fields argues for a bottleneck that was either very strong or occurred  
249 with high frequency, or both. Although there are no studies, to our knowledge, that examine the  
250 temporal genetics of agricultural weed populations for comparison, it is of note that the average  
251 loss of allelic richness that we identified across populations (on average 15% lower between  
252 cohorts) is similar in magnitude to that of introduced, colonizing species (18% loss compared to  
253 native populations (26). Furthermore, using expected heterozygosity estimates from each  
254 sampling year, we find that the estimated population sizes have reduced between 2003 and 2012,  
255 with the majority of the populations losing reproductive individuals. While we did not take  
256 population census data in 2003 for comparison, we find that the estimated population size in  
257 2012 is not significantly different from the census size, suggesting that our estimated population  
258 sizes are decent approximations of the true sample size. While the majority of the populations  
259 exhibited loss of alleles between sampling years, two populations—#26 and #28—exhibited  
260 gains of low frequency alleles, and the estimated sample size of these two populations likewise  
261 increased relative to other populations. The increased diversity of these populations likely were  
262 from dormant seeds, or, alternatively, due to migration from another population. Emergence of  
263 seed stored in the seed bank is incredibly likely—this species can produce a large number of  
264 seeds in field conditions (between 3,000-10,000 per individual), and these heavy, gravity  
265 dispersed seeds can remain dormant for ~20 years in the soil (27).

266 Recent work provides an interesting contrast between the phenotypic and neutral genetic  
267 variation spatially distributed within this system—while neutral genetic differentiation among 44  
268 *I. purpurea* populations is low (i.e.,  $F_{ST} = 0.127$ ), populations are significantly differentiated for  
269 herbicide resistance across the landscape, with some populations exhibiting high and others very  
270 low resistance (19). Our screen of adaptive variation in 26 of these temporally sampled  
271 populations shows that, in addition to a mosaic of resistance across the landscape, the level of  
272 resistance in this species has increased over time. This finding is especially interesting in light of  
273 the reduced neutral genetic variation that we identified and, alternatively, evidence of potential  
274 migrants in the 2012 cohort—reductions in diversity as well as influx of presumably non-adapted  
275 variation would either act to impede or to counteract adaptation. These forces, along with recent  
276 work showing a severe fitness penalty of herbicide resistance in this species (28) likely explain

277 why the average increase in resistance that we identified was modest—perhaps the populations  
278 that maintained resistance between sampling years (TN populations) or those that exhibit large  
279 increases in resistance (NC/SC populations) were less influenced by susceptible migrants  
280 germinating from the seed bank and/or costs of resistance than other populations. Interestingly,  
281 there was no evidence that plants were different in size between the years, indicating that the  
282 increased resistance we detected is not due to plants simply being larger in the 2012 cohort and  
283 thus better able to withstand herbicide application.

284 Further, we found that the temporal increase in resistance is inconsistent solely with the  
285 action of genetic drift. Our  $P_{CT}$ - $F_{CT}$  comparisons indicate that the variation between years in  
286 biomass remaining after herbicide application was significantly greater than variation due to  
287 neutral processes, which suggests resistance has increased due to the action of selection and  
288 subsequent adaptation. Although these data are compelling, they must be interpreted cautiously.  
289  $P_{CT}$  estimates are sensitive to environmental and non-additive genetic effects (29); because we  
290 are assessing population-level variation and did not use a half- or full-sib design we are not able  
291 to decouple additive genetic variation from maternal and paternal effects as well as other  
292 potential environmental influences (24). However, we have previously identified an additive  
293 genetic basis underlying glyphosate resistance in one population of this species (18), and, further,  
294 positive selection for increased resistance in the field (18). Thus, although the  $P_{CT}$  estimate  
295 provided here includes many sources of variation, the presence of genetic variation and evidence  
296 for selection on this variation broadly supports a scenario of adaptive evolution. Further, we  
297 know that selection *via* glyphosate application was relatively consistent across these sampled  
298 locations—we have historical record for six of 10 years (Table S1) which shows that these  
299 locations were used for corn and soy crops, both of which make use of herbicides for weed  
300 control. Given that ~98% of soy planted since 2004 has been RoundUp Ready, and that on  
301 average over 50% of corn crops are also RR (30), it is highly likely that our sampling locations  
302 have experienced glyphosate application on a regular or somewhat consistent basis. Thus, in  
303 sum, all the pre-requisites for the evolution of herbicide resistance by adaptation are present in  
304 this system, including evidence of a consistently applied selective agent. That we identify an  
305 increase in resistance between two temporally distinct samples provides strong evidence that  
306 glyphosate resistance results from adaptation to the agricultural regime. Identification of the  
307 genetic basis of resistance in this system, and an assessment of how alleles associated with  
308 resistance change over time will decisively test our hypothesis that selection from the use of this  
309 herbicide is leading to adaptation.

310 Conclusions—Weedy plant species found in agricultural fields experience strong selection and  
311 thus are hypothesized to be either plastic, capable of adaptation, or saved from extinction through  
312 gene flow (31, 32). By using a resurrection ecology framework, we provide evidence that even  
313 though genetic variation is lost from the system, populations show signs of adaptation to  
314 herbicide application. While previous work indicates that the majority of the gene flow across  
315 southeastern populations occurred prior to the wide-spread adoption and use of glyphosate,  
316 suggesting that resistance evolution is due to selection on standing or novel variation within  
317 populations, that we identified evidence of potential migrants into the 2012 gene pool does not  
318 allow us to rule out the hypothesis that resistance is introduced from outside sources.



319 Further, while we find evidence of increased resistance, we also show that the absolute  
320 change between years was not drastic; large resistance gains were limited to particular  
321 populations. These data suggest heightened measures should be taken to reduce the likelihood  
322 that seeds are accidentally moved between crop fields through farm machinery or through  
323 contaminated seed lots. Finally, we do not have evidence that the lower genome-wide diversity  
324 identified across populations is due the application of glyphosate *per se*—other herbicides with  
325 different mechanisms of action are often applied in corn crops, other cropping techniques that  
326 reduce population sizes might have been employed, and it is also possible that populations have  
327 lost diversity due to changes in the climate, as found in Nevo, 2012 (33). The results shown here  
328 suggest that this weed, while being a ‘general purpose genotype’(1, 34) is also capable of  
329 adaptive evolution even while losing significant allelic diversity. How likely future adaptation to  
330 novel selective forces may be in the future, in light of reduced variation, is unknown.

### 331 **Materials and Methods**

332 **Population sampling.** Population locations and sampling strategies for 44 *I. purpurea*  
333 populations were previously described in Kuester *et al* (19). Twenty-six of these populations  
334 were sampled in 2003 and resampled in 2012 (see Figure 1). In each year, we collected replicate  
335 seeds from between 6-30 maternal individuals at least 1 m apart from one another along a linear  
336 transect. We estimated population size in the 2012 sampling year by counting the numbers of  
337 individuals down a linear transect. We used replicate seeds from maternal individuals sampled in  
338 both 2003 and 2012 from the same locations to perform three separate experiments: 1) a screen  
339 of neutral genetic diversity, 2) an assessment of herbicide resistance, and 3) a comparison of  
340 growth and size traits.

341 Of the 26 populations that were sampled both years, we randomly chose 10 to examine  
342 potential changes in genetic diversity between 2003 and 2012. One seed from an average of 18  
343 maternal lines per population per sampling year (355 individuals total) were germinated and  
344 cotyledons were used for DNA isolation using a CTAB method modified from Stokes *et al.* 2009  
345 (see Kuester *et al.* (19) for details).

346 To assay herbicide resistance among populations and between sampling years, we planted  
347 two replicate greenhouse experiments of all 26 populations at the University of Georgia Plant  
348 Biology Greenhouses (Athens, GA). One seed from 10 maternal lines per population per  
349 sampling year were scarified and planted in pine bark soil in SC10 super conetainers (Stuewe  
350 and Sons, Tangent, OR) in six experimental treatments, described below. This design was  
351 replicated in its entirety in another greenhouse for a total of 20 seeds per population within each  
352 treatment and thus an overall total of 5381 experimental individuals. Plants were randomly  
353 assigned to racks that were then randomly assigned to flow trays (4 racks per flow tray).  
354 Conetainers were watered daily and flow trays were filled with water to prevent desiccation.  
355 Germination was slightly higher in 2003 compared to 2012 samples (87% and 84% in 2003 and  
356 2012, respectively,  $\chi^2_1 = 12.27$ ,  $P < 0.001$ ) and ranged from 50-98% across populations. While  
357 mutations could have accumulated in the stored seeds sampled from 2003, that our germination  
358 rates were moderately higher in the 2003 versus the 2012 cohort suggests that our result of  
359 strikingly lower allelic variation in the 2012 sample (see Results) was not driven primarily by  
360 seed storage of the 2003 cohort.

361 Plants were sprayed with RoundUp PowerMax (Monsanto, St Louis, MO) 22 days after  
362 planting at rates around the recommended field rate (1.54 kg ai/ha) of 0, 0.21, 0.42, 0.84, 1.70  
363 and 3.40 kg a.i./ha (the 0 kg a.i./ha control treatment was sprayed with water) using a hand-held,  
364 CO<sub>2</sub> pressurized sprayer (R & D Sprayers, Opelousas, LA). We sprayed plants at a speed of 187  
365 liters/ ha at 30 psi with a stride pace of 90 paces per minute at 1.5 meters above the plants. Three  
366 weeks after glyphosate application we scored survival of each plant. Plants were harvested, dried  
367 at 72°C for 48 hours and measured for total above ground biomass. Biomass values were  
368 adjusted to the non-sprayed controls by dividing each individual by the average biomass of its  
369 population grown in the non-spray control treatment following standard protocols (35).

370 Finally, to examine the potential for growth and size changes between 2003 and 2012,  
371 seeds from 20 individuals from each of fifteen randomly sampled populations from each year  
372 were nicked and planted in 6 inch pots in the University of Michigan greenhouses at Matthaei  
373 Botanical Gardens in May 2014. Two replicate experiments were planted two weeks apart (351  
374 and 375 individuals in each of the two experimental replicates), for a total of 726 experimental  
375 individuals. We measured plant height and the number of leaves after plants had grown 4 weeks  
376 in standard greenhouse conditions.

377 **SSR genotyping and scoring errors.** Details on multiplexing SSR markers and scoring  
378 procedures can be found in Kuester et al (19). Briefly, 15 polymorphic microsatellite loci were  
379 used to examine genetic diversity across populations and sampling years, and all individuals  
380 were scored by hand. We randomly double-scored 100 individuals across loci to check accuracy  
381 of multi-locus genotypes, and found very few scoring errors and no large allele drop outs or  
382 scoring errors due to stutter in any of the locus by population by year combinations. We also  
383 examined the influence of null alleles on genetic differentiation and found little evidence that  
384 potential null alleles changed our  $F_{CT}$  values. Details of these analyses are presented in the SI  
385 Materials and Methods.

386 **Temporal genetic differentiation and diversity.** We examined the potential that seeds sampled  
387 across collection years were genetically differentiated from one another in two ways. First, we  
388 estimated genetic differentiation between years using hierarchical AMOVA in GenAlEx v. 6.5  
389 (36). We also performed individual assignment (37, 38) of individuals to sampling year using  
390 GeneClass2 (39). For individual assignment, the inability to assign individuals to a specific  
391 sampling year would indicate that individuals sampled in 2012 had not diverged in allelic  
392 composition compared to the individuals sampled in 2003. We used the Bayesian method  
393 described by Baudouin and Lebrun (40) as a criterion for computation, and individual  
394 assignment was performed using the leave-one-out procedure (41), where the genotype to be  
395 assigned was not included in the population from which it was sampled. We report the  $-\log$   
396 likelihood of being assigned in each sampled year, by plotting the  $-\log$  likelihood value of  
397 individual assignment to 2003 sample year against the  $-\log$  likelihood of being assigned to the  
398 2012 sampling year. Lack of temporal change across sampling years would be indicated by  
399 overlap of individuals sampled from each year. We calculated expected and observed  
400 heterozygosity ( $H_e$  and  $H_o$ ), the number of alleles ( $N_a$ ) and the number of effective alleles ( $N_e$ )  
401 using GenAlEx v 6.5 (36) and gene diversity (GD) and allelic richness (AR) using FSTAT v.  
402 2.9.3.2 (42) and determined if there were reductions in diversity estimates between 2003 and  
403 2012 using Wilcoxon matched pairs rank sum tests (43). Finally, we examined the possibility  
404 that populations experienced genetic bottleneck using the program BOTTLENECK (39). Three  
405 significance tests described by Cornuet and Luikart (38) and (44) signed rank, standard

406 differences and Wilcoxon test) were assessed under an infinite allele model of microsatellite  
407 evolution.

408

409 **Resistance screen and growth traits.** We examined whether populations and sampling years  
410 varied for resistance or growth and size traits using univariate mixed-model analyses of variance.  
411 For the resistance screen, we used the lmer option of the lme4 package in R (45) for our models  
412 in which replicate greenhouse experiment, herbicide treatment, collection year, and population  
413 were the independent variables with standardized biomass and survival as the dependent  
414 variables. Survival was modeled as a binary character (0/1). We included interactions between  
415 population and collection year as well as population, collection year and treatment. Population  
416 and its interaction terms were considered random effects in the model whereas all other effects  
417 were fixed. We previously identified a significant population effect from the 2012 cohort for  
418 survival post-herbicide application, which indicated that populations vary in their respective  
419 level of resistance (19). Here we are specifically interested in the year term as well as interaction  
420 terms including the year effect, which would indicate that resistance varies between sampling  
421 years and/or that populations vary in their level of resistance between years. An F-test was used  
422 to determine the significance of fixed effects, and the significance of each random effect in the  
423 model was determined using a likelihood ratio test (LRT) in which the full model was compared  
424 to a reduced model with the effect of interest removed. The *P*-value was determined using a  $\chi^2$   
425 test with one degree of freedom.

426 Finally, to determine if populations or individuals from different sampling years varied  
427 for growth traits, we ran univariate analysis of variance with experimental replicate, sampling  
428 year, population and the population x year interaction term as independent variables with height  
429 and the number of leaves as the independent variables using the lmer option of the lme4 package  
430 (45) in R v 3.1.1 (46). Experimental replicate and sampling year were considered fixed effects in  
431 each model with population and its interactions considered random effects. The significance of  
432 each effect in the model was examined as in the resistance assay above. Height and the number  
433 of leaves were modeled with Poisson distributions.

434 In all models, we examined the normality of all dependent variables with the Shapiro-  
435 Wilk test and by visual inspection of quantile-quantile (q-q) plot. Biomass following herbicide  
436 application was square root transformed to improve normality of the residuals.

437 **Adaptive trait differentiation.** We next employed a hierarchical  $P_{CT}$  (Pseudo- $Q_{CT}$ )- $F_{CT}$   
438 comparison modified from Duncan and Rausher (25) to determine if there was evidence of  
439 adaptive evolution among sampling years. In the analyses here, populations are nested within  
440 sampling years and there are thus two hierarchical levels—among populations and among  
441 sampling years. To our knowledge, few studies use nested  $P_{CT}$ - $F_{CT}$  comparison in a temporal  
442 context (but see (11)). For the resistance trait (biomass remaining after herbicide application), we  
443 calculated the summary statistic  $P_{CT}$  using the method developed by Whitlock and Gilbert (47),  
444 which describes the amount of variation for a morphological trait between sampling years:

445 
$$P_{CT} = V_C / (V_C + V_P + 2V_I),$$

446 where  $V_C$ ,  $V_P$  and  $V_I$  are the components of genetic variation between sampling years, among  
447 populations, and among individuals within populations, respectively. We compare  $P_{CT}$  to  $F_{CT}$

448 using bootstrap sampling. To generate a bootstrap sample from each of the sampling years, we  
449 randomly sampled population from a year. We next randomly drew  $n$  individuals without  
450 replacement, where  $n$  equals the number of individuals originally sampled per population. This  
451 sampling procedure was performed for each sampling year (2003 and 2012 samples). We  
452 performed 1000 bootstrap replicates.  $P_{CT}$  or  $F_{CT}$  were calculated from a nested ANOVA or  
453 AMOVA (population nested within year) for each bootstrap sample. Because we could not  
454 estimate heritability from our data, we directly compared  $P_{CT}$  to  $F_{CT}$  at  $h^2 = 1$ , at which  $V_I$  was  
455 set equal to the within-population portion of variation from the ANOVA. Since it is very unlikely  
456 that all of the within-population variance explains the fraction due to the additive genetic  
457 variance, we compared  $P_{CT}$  to  $F_{CT}$  over a range wherein we scaled the  $V_I$  by a factor from 0 to 1.  
458 Estimates were similar across this range and are not reported; further, presenting the results at  $h^2$   
459  $= 1$  produces a smaller  $Q_{CT}$  and is thus more conservative. We present 95% confidence intervals  
460 of bootstrapped estimates for  $P_{CT}$  and  $F_{CT}$  as evidence of selection.

461

462 **Acknowledgements.** The authors wish to thank M. Van Etten, Y. Brandvain, D. Alvarado  
463 Serrano, and S. Colom for providing feedback that improved this manuscript, and A. Wilson, E.  
464 Fall, A. Teodorescu, S. Colom, and S. Smitka for assistance with greenhouse and lab work. This  
465 work was funded by USDA NIFA grants 04180 and 07191 to RSB and SMC.

466

## 467 **References**

468

- 469 1. Baker HG (1974) The evolution of weeds. *Annual Review of Ecology and Systematics*  
470 5:1–24.
- 471 2. Heap I (2011) International Survey of Herbicide Resistant Weeds. *Internet*. Available at:  
472 [www.weedscience.com](http://www.weedscience.com) [Accessed July 8, 2015].
- 473 3. Oerke EC (2005) Crop losses to pests. *J Agric Sci* 144(1):31–14.
- 474 4. Pimentel D, Zuniga R, Morrison D (2005) Update on the environmental and economic  
475 costs associated with alien-invasive species in the United States. *Ecological Economics*  
476 52(3):273–288.
- 477 5. Vigueira CC, Olsen KM, Caicedo AL (2013) The red queen in the corn: agricultural  
478 weeds as models of rapid adaptive evolution. *Heredity* 110(4):303–311.
- 479 6. Jasieniuk M, Brule-Babel AL, Morrison IN (1996) The evolution and genetics of  
480 herbicide resistance in weeds. *Weed Science* 44:176–193.
- 481 7. Nei M, Maruyama T, Chakraborty R (1975) The bottleneck effect and genetic variability  
482 in populations. *Evolution* 29(1):1–10.
- 483 8. Hamrick JL, Linhart YB, Mitton JB (1979) Relationships between life history  
484 characteristics and electrophoretically detectable genetic variation in plants. *Annual*

- 485        *Review of Ecology and Systematics* 10:173–200.
- 486    9.    Muller M-H, Latreille M, Tollon C (2010) The origin and evolution of a recent  
487        agricultural weed: population genetic diversity of weedy populations of sunflower  
488        (*Helianthus annuus* L.) in Spain and France. *Evolutionary Applications* 4(3):499–514.
- 489    10.    Kane NC, Rieseberg LH (2008) Genetics and evolution of weedy *Helianthus annuus*  
490        populations: adaptation of an agricultural weed. *Molecular Ecology* 17(1):384–394.
- 491    11.    Orsini L, et al. (2013) The evolutionary time machine: using dormant propagules to  
492        forecast how populations can adapt to changing environments. *Trends in Ecology &*  
493        *Evolution* 28(5):274–282.
- 494    12.    Lenski RE (1998) Bacterial evolution and the cost of antibiotic resistance. *International*  
495        *microbiology : the official journal of the Spanish Society for Microbiology* 1(4):265–270.
- 496    13.    Baucom RS, Mauricio R (2010) Defence against the herbicide Round Up (R) predates its  
497        widespread use. *Evolutionary Ecology Research* 12(1):131–141.
- 498    14.    Franks SJ, Sim S, Weis AE (2007) Rapid evolution of flowering time by an annual plant  
499        in response to a climate fluctuation. *Proceedings of the National Academy of Sciences*  
500        104(4):1278–1282.
- 501    15.    Thomann M, Imbert E, Engstrand RC, Cheptou PO (2015) Contemporary evolution of  
502        plant reproductive strategies under global change is revealed by stored seeds. 28(4):766–  
503        778.
- 504    16.    Baucom RS, Chang S-M, Kniskern JM, Rausher MD, Stinchcombe JR (2011) Morning  
505        glory as a powerful model in ecological genomics: tracing adaptation through both natural  
506        and artificial selection. *Heredity* 107(5):377–385.
- 507    17.    Powles SB (2008) Evolved glyphosate-resistant weeds around the world: lessons to be  
508        learnt. *Pest Manag Sci* 64(4):360–365.
- 509    18.    Baucom RS, Mauricio R (2008) Constraints on the evolution of tolerance to herbicide in  
510        the common morning glory: resistance and tolerance are mutually exclusive. *Evolution*  
511        62(11):2842–2854.
- 512    19.    Kuester A, Chang S-M, Baucom RS (2015) The geographic mosaic of herbicide resistance  
513        evolution in the common morning glory, *Ipomoea purpurea*: Evidence for resistance  
514        hotspots and low genetic differentiation across the landscape. *Evolutionary Applications*  
515        In Press:1–44.
- 516    20.    Wright S (1931) Evolution in Mendelian populations. *Genetics* 16(2):0097–0159.
- 517    21.    Leberg PL (1992) Effects of population bottlenecks on genetic diversity as measured by  
518        allozyme electrophoresis. *Evolution* 46(2):477–494.

- 519 22. Nagylaki T The expected number of heterozygous sites in a subdivided population.  
520 *Genetics* 149:1599–1604.
- 521 23. Marriage TN, et al. (2009) Direct estimation of the mutation rate at dinucleotide  
522 microsatellite loci in *Arabidopsis thaliana* (Brassicaceae). *Heredity* 103(4):310–317.
- 523 24. Brommer JE (2011) Whither Pst? The approximation of Qst by Pst in evolutionary and  
524 conservation biology. *J Evol Biol* 24(6):1160–1168.
- 525 25. Duncan TM, Rausher MD (2013) Evolution of the selfing syndrome in *Ipomoea*. *Front*  
526 *Plant Sci* 4. doi:10.3389/fpls.2013.00301.
- 527 26. Dlugosch KM, Parker IM (2008) Founding events in species invasions: genetic variation,  
528 adaptive evolution, and the role of multiple introductions. *Molecular Ecology* 17(1):431–  
529 449.
- 530 27. Baskin CC, Baskin JM (1998) *Seeds: Ecology, Biogeography, and Evolution of Dormancy*  
531 *and Germination* ed Press A (San Diego).
- 532 28. Van Etten ML, Chang S-M, Baucom RS (2015) Reduced seed viability as a cost of  
533 glyphosate resistance in an agricultural weed. *In prep & included as supplemental to this*  
534 *manuscript:1–24*.
- 535 29. Pujol B, Wilson AJ, Ross RIC, Pannell JR (2008) Are Q(ST)-F(ST) comparisons for  
536 natural populations meaningful? *Molecular Ecology* 17(22):4782–4785.
- 537 30. ERS-USDA (2005) *Adoption of GE crops by U.S. farmers increases steadily* (Economic  
538 Research Service).
- 539 31. Baker HG (1974) The evolution of weeds. *Annu Rev Ecol Syst* 5:1–25.
- 540 32. Parker IM, Rodriguez J, Loik ME (2003) An evolutionary approach to understanding the  
541 biology of invasions: local adaptation and general-purpose genotypes in the weed  
542 *Verbascum thapsus*. *Conservation Biology* 17(1):59–72.
- 543 33. Nevo E, et al. (2012) Evolution of wild cereals during 28 years of global warming in  
544 Israel. *Proceedings of the National Academy of Sciences* 109(9):3412–3415.
- 545 34. Chaney L, Baucom RS (2014) The costs and benefits of tolerance to competition in  
546 *Ipomoea purpurea*, the common morning glory. *Evolution* 68(6):1698–1709.
- 547 35. Tehranchian P, et al. (2015) ALS-resistant mallflower umbrella sedge (*Cyperus difformis*)  
548 in Arkansas rice: physiological and molecular basis of resistance. *Weed Science* 63:561–  
549 568.
- 550 36. Peakall R, Smouse PE (2012) GenAlEx 6.5: genetic analysis in Excel. Population genetic  
551 software for teaching and research—an update. *Bioinformatics* 28(19):2537–2539.

- 552 37. Paetkau D, Calvert W, Stirling I, Strobeck C (1995) Microsatellite analysis of population  
553 structure in Canadian polar bears. *Molecular Ecology* 4:347–354.
- 554 38. Cornuet JM, Piry S, Luikart G, Estoup A, Solignac M (1999) New methods employing  
555 multilocus genotypes to select or exclude populations as origins of individuals. *Genetics*  
556 153:1989–2000.
- 557 39. Piry S, et al. (2004) GENECLASS2: a software for genetic assignment and first-  
558 generation migrant detection. *J Hered* 95(6):536–539.
- 559 40. Baudouin L, Lebrun P (2000) An operational Bayesian approach for the identification of  
560 sexually reproduced cross-fertilized populations using molecular markers. eds Doré C,  
561 Dosba F, Baril C (Montpellier, France), pp 81–93.
- 562 41. Paetkau D, Slade R, Burden M, Estoup A (2004) Genetic assignment methods for the  
563 direct, real-time estimation of migration rate: a simulation-based exploration of accuracy  
564 and power. *Molecular Ecology* 13:55–59.
- 565 42. Goudet J (2005) FSTAT (Version 1.2): A Computer Program to Calculate F-Statistics. *J*  
566 *Hered* 86(6):485–486.
- 567 43. Zar JH (1996) *Biostatistical analysis* (Prentice Hall, Upper Saddle River).
- 568 44. Cornuet JM, Luikart G (1996) Description and power analysis of two tests for detecting  
569 recent population bottlenecks from allele frequency data. *Genetics* 144(4):2001–2014.
- 570 45. Bates D, Maechler M, Bolker B (2011) lme4: linear mixed-effects models using S4  
571 classes.
- 572 46. R Core Team (2015) *R: A language and environment for statistical computing*. R  
573 *Foundation for Statistical Computing* Available at: <http://www.R-project.org/>.
- 574 47. Whitlock MC, Gilbert KJ (2012)  $Q_{ST}$  in a hierarchically structured population. *Mol Ecol*  
575 *Resour* 12(3):481–483.
- 576
- 577
- 578
- 579

## Tables

**Table 1.** The genetic diversity of populations between sampling years. Shown are the number of alleles (Na), the effective number of alleles (Ne), the observed and expected heterozygosity (Ho and He, respectively), allelic richness (AR), and gene diversity (GD).

| Population | Na   |      | Ne   |      | Ho   |      | He   |      | AR   |      | GD   |      |
|------------|------|------|------|------|------|------|------|------|------|------|------|------|
|            | 2003 | 2012 | 2003 | 2012 | 2003 | 2012 | 2003 | 2012 | 2003 | 2012 | 2003 | 2012 |
| 2          | 2.27 | 1.93 | 1.53 | 1.37 | 0.09 | 0.17 | 0.30 | 0.22 | 1.96 | 1.68 | 0.31 | 0.23 |
| 8          | 2.33 | 1.67 | 1.76 | 1.31 | 0.17 | 0.18 | 0.38 | 0.17 | 2.16 | 1.48 | 0.41 | 0.17 |
| 10         | 2.20 | 1.93 | 1.65 | 1.29 | 0.13 | 0.15 | 0.33 | 0.18 | 1.97 | 1.59 | 0.35 | 0.19 |
| 18         | 2.40 | 1.47 | 1.76 | 1.27 | 0.13 | 0.15 | 0.36 | 0.16 | 2.05 | 1.41 | 0.38 | 0.17 |
| 21         | 2.53 | 1.40 | 1.90 | 1.14 | 0.14 | 0.12 | 0.41 | 0.18 | 2.29 | 1.53 | 0.43 | 0.20 |
| 23         | 2.53 | 1.93 | 1.84 | 1.46 | 0.16 | 0.24 | 0.39 | 0.27 | 2.18 | 1.75 | 0.40 | 0.29 |
| 26         | 1.80 | 2.13 | 1.39 | 1.61 | 0.18 | 0.24 | 0.23 | 0.31 | 1.61 | 1.87 | 0.24 | 0.32 |
| 28         | 2.13 | 2.40 | 1.40 | 1.55 | 0.15 | 0.28 | 0.23 | 0.31 | 1.71 | 1.94 | 0.24 | 0.32 |
| 30         | 2.27 | 1.93 | 1.86 | 1.48 | 0.19 | 0.27 | 0.40 | 0.28 | 2.14 | 1.73 | 0.42 | 0.29 |
| 32         | 2.40 | 1.80 | 1.73 | 1.43 | 0.14 | 0.23 | 0.37 | 0.24 | 2.14 | 1.66 | 0.39 | 0.25 |



## Figures

Figure 1. Map of populations sampled from A) 2003 and B) 2012 within the US. Populations that were genotyped in both 2003 and 2012 are indicated by a triangle (see Table S1 for sites used for resistance and growth trait measurements). The percent survival following 3.4 kg ai/ha of RoundUp is indicated in color. Sites were sampled at least 5 km apart.

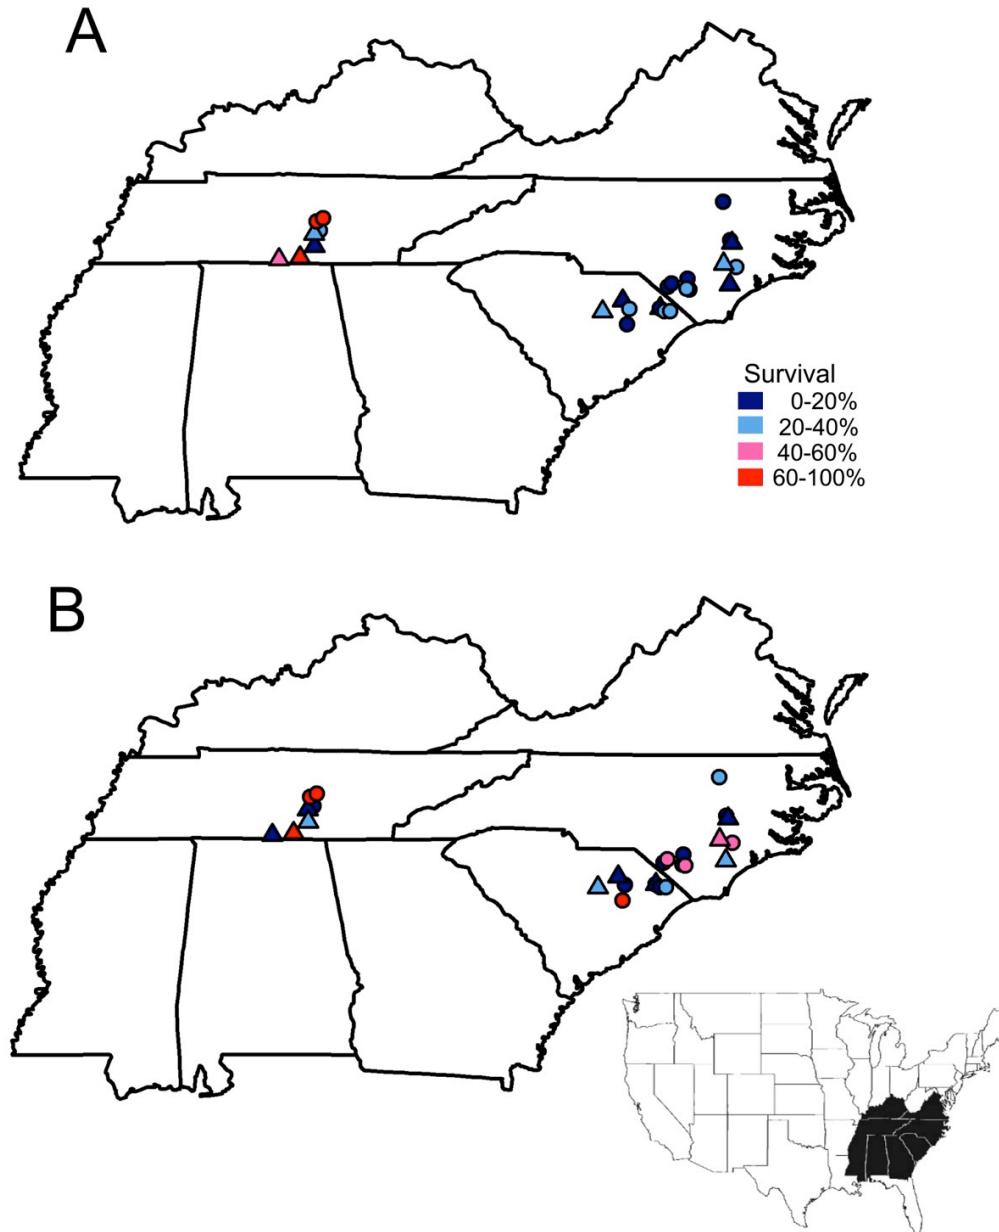

Figure 2. Genetic diversity indices compared between sampling years (2003 and 2012). Shown are (A) number of alleles ( $N_a$ ), (B) effective number of alleles ( $N_e$ ), (C) observed heterozygosity ( $H_o$ ), (D) expected heterozygosity ( $H_e$ ), (E) allelic richness (AR), and (F) gene diversity (GD). Mean values for each year are depicted plus or minus one standard error.

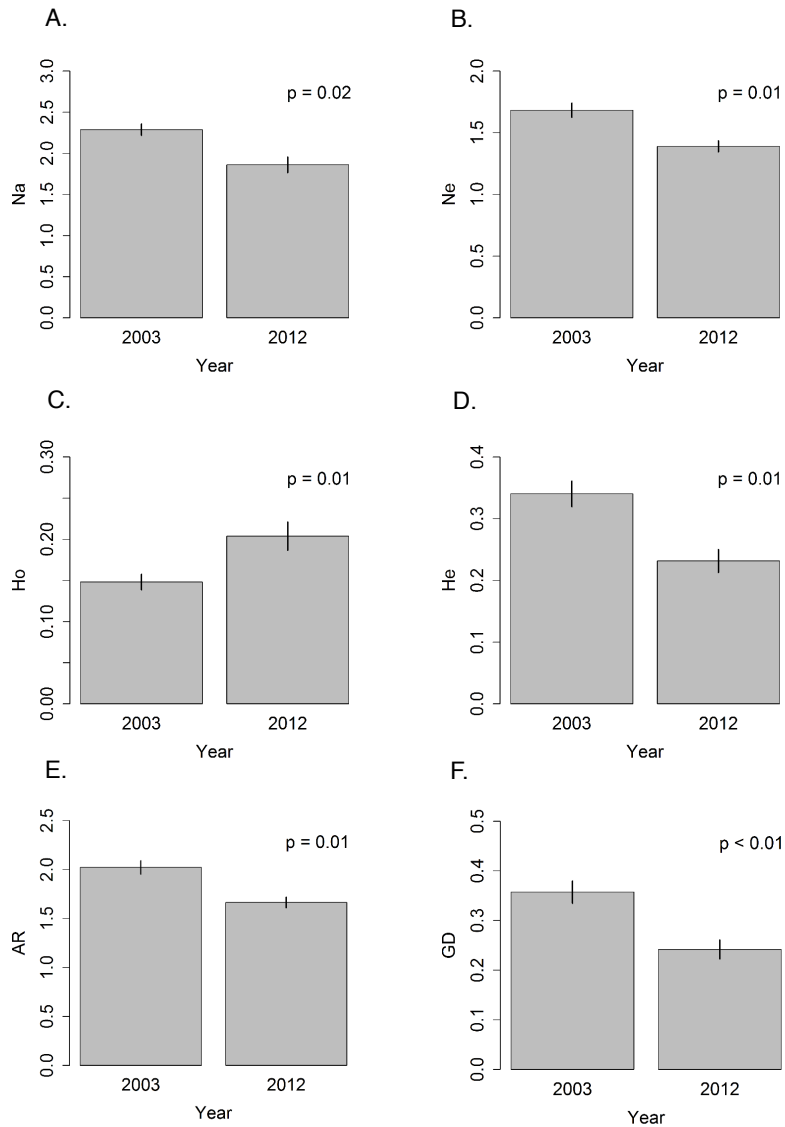

Figure 3. Scatter plots of log likelihood values from assignment tests of individual *I. purpurea* plants sampled in 2003 and 2012 based on genotypic data at 15 microsatellite loci. A higher position relative to the y-axis indicates a higher likelihood of being from 2012 pool of individuals and a higher position relative to the x-axis indicates greater likelihood of being from 2003 pool of individuals.

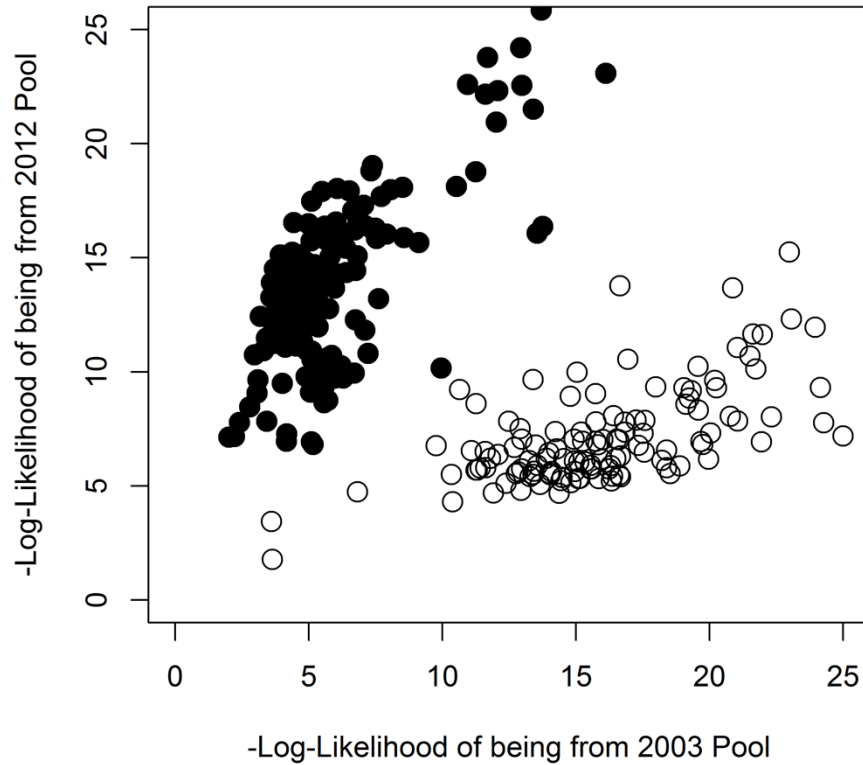

Figure 4.  $P_{CT}$  (light grey) vs  $F_{CT}$  (dark grey) analysis of biomass remaining after herbicide application, estimated at  $h^2 = 1$ . Frequency indicates the number of bootstrap runs that returned  $P_{CT}$  and  $F_{CT}$  estimates.

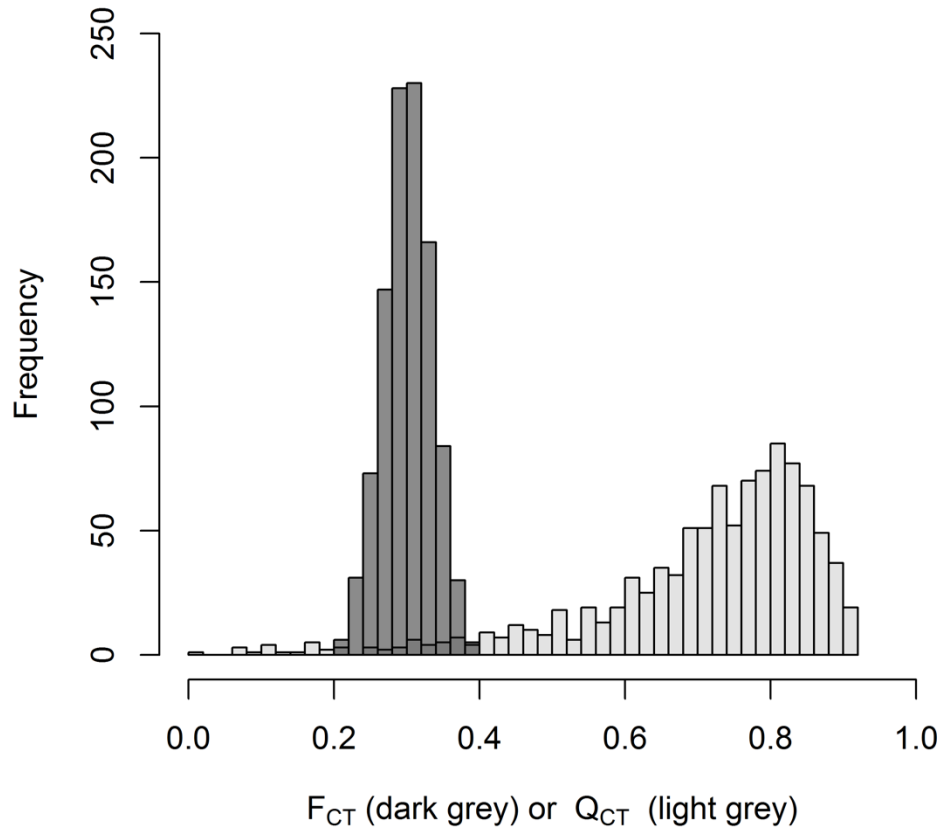

## Supporting Information

### Materials and Methods

*Scoring errors*—We assessed scoring errors per locus x population combination using MicroChecker (Van Oosterhout et al. 2004). Null alleles were detected in 13 of 15 loci (5-40% of populations, mean = 25%). We found no significant difference in genetic structure (uncorrected  $F_{CT}$ : 0.33-0.46, corrected  $F_{CT}$ : 0.31-0.43) after adjusting for the presence of potential null alleles. Large allele dropout—under-amplification of larger allelic variants— and scoring errors due to stutter—an error resulting from slippage of the polymerase during PCR— were not detected in our dataset.

The total number of alleles observed per locus within 184 individuals sampled in 2003 and 171 individuals sampled in 2012 samples ranged from 2 to 7 in 2003 and 1 to 7 in 2012. Overall, we found a total of 42 alleles scored across 15 loci in 2003 and 44 alleles in 2012. On average there were 2.3 alleles per locus x population combination in 2003 and 1.9 alleles in 2012. The size range of alleles ranged roughly between 90 and 300 base pairs.

*Hardy-Weinberg Equilibrium*—Deviations from Hardy-Weinberg equilibrium (HWE) were tested using GenePop v 3.3 (Raymond and Rousset 1995). Of 150 locus x population tests, 86 locus x population pairs from 2003 and 24 pairs from 2012 deviated from HWE, with ranges of loci deviating per population from 5-11 and 0-5 from 2003 and 2012, respectively. We similarly found much higher values of  $F_{IJ}$  in 2003 compared to 2012 (average  $F_{IJ}$  2003 = 0.529, average  $F_{IJ}$  2012 = 0.165).

*Loci under selection*—Loci under selection were identified using BayeScan (Foll and Gaggiotti 2008), which uses a multinomial-Dirichlet model using inter-population differences in allele frequency patterns (Foll et al. 2010). We used 5000 iterations and default model parameters for loci assessment. We detected 5 outlier loci with signature of diversifying selection across populations (IP31, IP8, IP18, IP1, IP26). When we removed these five loci from our estimate of  $F_{CT}$ , we found little difference from  $F_{CT}$  estimation with all loci (95% C.I.  $F_{CT}$  15 loci : 0.232-0.364, 95% C.I.  $F_{CT}$  10 loci: 0.245-0.372 ), which did not impact our interpretation of  $Q_{CT}$ - $F_{CT}$  comparison for biomass data (95% C.I.  $Q_{CT}$  Biomass: 0.416-0.941).

*Linkage disequilibrium*—We tested the presence of linkage disequilibrium between locus pairs for each population x sampling year combination using GenePop v 3.3 (Raymond and Rousset 1995). All results were adjusted for multiple comparisons using Bonferroni correction (Rice 1989). Of 105 tested paired locus tests over either 2003 or 2012 sampled populations for linkage disequilibrium, 36 were found significant in 2003, though no disequilibrium in 2012 ( $P < 0.05$ ). The majority of locus pairs in disequilibrium were from population 26 (25 significant pairs).

*Scoring accuracy*— We found the scoring error rates per locus after re-scoring 200 individuals: IP31 (0%), IP2 (3.7%), IP27 (0%), IP8 (0%), IP34 (0%), IP1 (0%), IP36 (6.52%), IP47 (1.45%), IP12 (1.45%), IP21 (5.07%), IP6 (1.45%), IP45 (2.17%), IP26 (2.17%), IP42 (3.62%).

## References

- Foll, M, and Gaggiotti, O (2008). A genome-scan method to identify selected loci appropriate for both dominant and codominant markers: a Bayesian perspective. *Genetics*, 180(2):977-993.
- Foll, M, Fischer, MC, Heckel, G and Excoffier, L (2010). Estimating population structure from AFLP amplification intensity. *Molecular Ecology*, 19:4638-4647.
- Raymond, M, and F Rousset (1995). GENEPOP (Version 1.2): Population Genetics Software for Exact Tests and Ecumenicism. *J Heredity*, 86(3):248-249.
- Rice, WR (1989). Analyzing tables of statistical tests. *Evolution*, 43(1):223-225.
- Van Oosterhout, C, Hutchinson, WF, Wills, DP, and Shipley, P (2004). MICRO-CHECKER: software for identifying and correcting genotyping errors in microsatellite data. *Molecular Ecology Notes*, 4(3):535-538.

## Supplementary Tables

**Table S1.** Site and location information for *I. purpurea* populations used in genetic, growth and herbicide resistant assays. Shown are the population number, state of each population, the crop present in the field from 2008 to 2012, along with Latitude and Longitude GPS coordinates.

| Population Number | State | Field Type |         |         |         |         |         | Latitude  | Longitude  |
|-------------------|-------|------------|---------|---------|---------|---------|---------|-----------|------------|
|                   |       | 2003       | 2008    | 2009    | 2010    | 2011    | 2012    |           |            |
| 2                 | NC    | soy        | corn    | soy     | corn    | soy     | corn    | 34.595714 | -77.927484 |
| 4                 | NC    | soy        | corn    | soy     | corn    | soy     | corn    | 34.556672 | -79.125602 |
| 9                 | NC    | soy        | na      | soy     | soy     | soy     | soy     | 34.924044 | -77.796171 |
| 10                | NC    | soy        | corn    | corn    | soy     | corn    | soy     | 34.983161 | -78.039309 |
| 11                | NC    | soy        | corn    | soy     | corn    | soy     | corn    | 34.527135 | -78.756704 |
| 14                | NC    | na         | cotton  | soy     | soy     | soy     | soy     | 35.424763 | -77.917121 |
| 19                | NC    | soy        | corn    | soy     | corn    | tobacco | corn    | 34.508193 | -78.70899  |
| 21                | NC    | soy        | cotton  | soy     | corn    | cotton  | soy     | 35.369816 | -77.877314 |
| 22                | NC    | soy        | soy     | cotton  | corn    | corn    | corn    | 36.1436   | -78.053422 |
| 25                | NC    | soy        | soy     | soy     | fallow  | soy     | corn    | 34.616361 | -79.051667 |
| 29                | NC    | soy        | corn    | soy     | corn    | soy     | corn    | 34.705135 | -78.738897 |
| 5                 | SC    | soy        | soy     | soy     | soy     | corn    | soy     | 33.859875 | -79.909072 |
| 8                 | SC    | na         | corn    | soy     | corn    | soy     | corn    | 34.297195 | -79.991259 |
| 12                | SC    | soy        | soy     | corn    | soy     | cotton  | Cotton  | 34.145812 | -79.865313 |
| 15                | SC    | soy        | soy     | soy     | peanut  | soy     | soy     | 34.104209 | -79.073735 |
| 16                | SC    | soy        | fallow  | fallow  | fallow  | peanut  | Alfalfa | 34.10535  | -79.183234 |
| 17                | SC    | soy        | soy     | soy     | soy     | soy     | soy     | 34.159155 | -79.272908 |
| 18                | SC    | soy        | soy     | soy     | corn    | soy     | corn    | 34.156593 | -79.27027  |
| 28                | SC    | soy        | cotton  | corn    | soy     | cotton  | corn    | 34.097917 | -80.377715 |
| 47                | SC    | na         | soy     | corn    | soy     | cotton  | soy     | 34.282132 | -79.746597 |
| 1                 | TN    | corn       | alfalfa | alfalfa | alfalfa | soy     | corn    | 35.775237 | -85.903419 |
| 20                | TN    | soy        | soy     | soy     | soy     | soy     | corn    | 35.830692 | -85.777871 |
| 23                | TN    | soy        | corn    | soy     | corn    | soy     | corn    | 35.067905 | -86.62955  |
| 26                | TN    | soy        | corn    | soy     | soy     | corn    | soy     | 35.533413 | -85.951902 |
| 30                | TN    | corn       | corn    | soy     | corn    | soy     | corn    | 35.31105  | -85.945003 |
| 31                | TN    | corn       | soy     | corn    | soy     | soy     | corn    | 35.608482 | -85.846379 |
| 32                | TN    | soy        | soy     | soy     | soy     | soy     | corn    | 35.099356 | -86.225509 |

**Table S2.** Test for Cornuet and Luikart's (1996) bottleneck detection using an infinite allele model of microsatellite evolution. Shown are p-values from three tests described by Cornuet and Luikart (1996) and Luikart et al. (1997) for each population sampled in 2012.

| Population | Signed test | Standard Differences | Wilcoxon Test |
|------------|-------------|----------------------|---------------|
| 2          | 0.502       | 0.267                | 0.313         |
| 8          | 0.247       | 0.163                | 0.230         |
| 10         | 0.541       | 0.333                | 0.765         |
| 18         | 0.025       | 0.036                | 0.027         |
| 21         | 0.557       | 0.232                | 0.371         |
| 23         | 0.170       | 0.047                | 0.095         |
| 26         | 0.389       | 0.050                | 0.122         |
| 28         | 0.296       | 0.221                | 0.249         |
| 32         | 0.126       | 0.024                | 0.012         |
| 30         | 0.035       | 0.017                | 0.032         |



**Table S3.** Analysis of Molecular Variance (AMOVA) of neutral genetic data. Shown are the main effects of sampling year (2003 vs 2012), population nested within year and individuals nested within populations, and F and P values for each effect.

| Source                  | df  | F-Statistics | Value | P     |
|-------------------------|-----|--------------|-------|-------|
| Year                    | 1   | $F_{RT}$     | 0.306 | 0.001 |
| Population(Year)        | 18  | $F_{SR}$     | 0.214 | 0.001 |
| Individual (Population) | 335 | $F_{ST}$     | 0.454 | 0.001 |
| Individual (Total)      | 355 | $F_{IS}$     | 0.514 | 0.001 |
| Total                   | 709 | $F_{IT}$     | 0.735 | 0.001 |

**Table S4.** Generalized linear mixed effects model of (A) resistance and (B) size traits in *I. purpurea*. Models include fixed effects of experimental replicate, treatment, sampling year, sampling x treatment interaction; population and interactions of population x year, population x treatment, and population x treatment x year are considered random effects. Survival was modeled with a binomial distribution, biomass after herbicide fit a gaussian distribution, and plant height and number of leaves were best modeled with a poisson distribution. Biomass was square-root transformed prior to analysis. For each model, we show the degrees of freedom (Df), sums of squares (SS), mean square error (MSE), F or  $\chi^2$  statistic and associated P value.

A.

| Fixed Effects                 | Df   | SS      | Survival |                            |        | Df   | SS     | Biomass                    |         |        |
|-------------------------------|------|---------|----------|----------------------------|--------|------|--------|----------------------------|---------|--------|
|                               |      |         | MSE      | F                          | P      |      |        | MSE                        | F       | P      |
| Replicate                     | 1    | 14.460  | 14.459   | 14.459                     | <0.001 | 1    | 0.625  | 0.625                      | 12.575  | <0.001 |
| Treatment                     | 5    | 773.710 | 154.742  | 154.742                    | <0.001 | 5    | 47.495 | 9.499                      | 190.978 | <0.001 |
| Year                          | 1    | 2.580   | 2.578    | 2.578                      | 0.108  | 1    | 0.235  | 0.235                      | 4.724   | 0.030  |
| Year x Treatment              | 5    | 0.460   | 0.092    | 0.092                      | 0.994  | 5    | 0.213  | 0.043                      | 0.855   | 0.511  |
| <u>Random Effects</u>         |      |         |          | <u><math>\chi^2</math></u> |        |      |        | <u><math>\chi^2</math></u> |         |        |
| Population                    | 1    |         |          | 19.179                     | <0.001 | 1    |        |                            | 4.972   | 0.026  |
| Population x Year             | 1    |         |          | 23.747                     | <0.001 | 1    |        |                            | 7.921   | 0.005  |
| Population x Treatment        | 1    |         |          | 3.701                      | 0.054  | 1    |        |                            | <0.001  | 1.000  |
| Population x Treatment x Year | 1    |         |          | <0.001                     | 1.000  | 1    |        |                            | <0.001  | 1.000  |
| Residual DF                   | 5365 |         |          |                            |        | 3595 |        |                            |         |        |

B.

| Fixed Effects         | Df  | SS    | Height |                            |        | Df  | SS     | Number of Leaves           |        |        |
|-----------------------|-----|-------|--------|----------------------------|--------|-----|--------|----------------------------|--------|--------|
|                       |     |       | MSE    | F                          | P      |     |        | MSE                        | F      | P      |
| Replicate             | 1   | 449.7 | 449.7  | 449.701                    | <0.001 | 1   | 4.458  | 4.458                      | 4.458  | 0.035  |
| Year                  | 1   | 0.63  | 0.63   | 0.6269                     | 0.429  | 1   | 0.0304 | 0.0304                     | 0.0304 | 0.862  |
| <u>Random Effects</u> |     |       |        | <u><math>\chi^2</math></u> |        |     |        | <u><math>\chi^2</math></u> |        |        |
| Population            | 1   |       |        | 0.6457                     | 0.4217 | 1   |        |                            | 2.142  | 0.1433 |
| Population x Year     | 1   |       |        | 1496.4                     | <0.001 | 1   |        |                            | 0      | 1      |
| Residual              | 706 |       |        |                            |        | 706 |        |                            |        |        |

**Table S5.** Mean and standard error for (A) resistance traits (survival and above-ground biomass at 1.7 kg a.i./ha glyphosate) and (B) size traits (plant height and number of leaves) for each population x year combination. Survival was calculated as the number of individuals per population that survived glyphosate application divided by the total number of individuals within the population.

| A. Resistance Traits |                    |                           |             |       |             |       |
|----------------------|--------------------|---------------------------|-------------|-------|-------------|-------|
| PopID                | Survival           |                           | Biomass     |       |             |       |
|                      | 2003<br>Proportion | <u>2012</u><br>Proportion | <u>2003</u> |       | <u>2012</u> |       |
|                      |                    |                           | Mean        | SE    | Mean        | SE    |
| 1                    | 1.000              | 1.000                     | --          |       | --          |       |
| 2                    | 0.278              | 0.353                     | 0.575       | 0.120 | 0.395       | 0.051 |
| 4                    | 0.158              | 0.211                     | 0.430       | 0.035 | 0.466       | 0.058 |
| 5                    | 0.263              | 0.727                     | 0.479       | 0.051 | 0.449       | 0.075 |
| 8                    | 0.647              | 0.529                     | 0.755       | 0.130 | 0.688       | 0.130 |
| 9                    | 0.474              | 0.538                     | 0.364       | 0.043 | 0.513       | 0.089 |
| 10                   | 0.211              | 1.000                     | 0.436       | 0.052 | 0.328       | 0.113 |
| 11                   | 0.400              | 0.471                     | 0.371       | 0.073 | 0.618       | 0.099 |
| 12                   | 0.105              | 0.200                     | 0.453       | 0.056 | 0.521       | 0.051 |
| 14                   | 0.368              | 0.150                     | 0.552       | 0.066 | 0.457       | 0.088 |
| 15                   | 0.444              | 0.263                     | 0.564       | 0.099 | 0.602       | 0.095 |
| 16                   | 0.353              | 0.263                     | 0.266       | 0.034 | 0.429       | 0.055 |
| 17                   | 0.150              | 0.250                     | 0.392       | 0.029 | 0.517       | 0.053 |
| 18                   | 0.211              | 0.389                     | 0.450       | 0.080 | 0.479       | 0.041 |
| 19                   | 0.333              | 0.667                     | 0.383       | 0.046 | 0.524       | 0.049 |
| 20                   | 0.900              | 1.000                     | --          |       | --          |       |
| 21                   | 0.368              | 0.438                     | 0.545       | 0.089 | 0.508       | 0.055 |
| 22                   | 0.667              | 0.421                     | 0.406       | 0.059 | 0.502       | 0.120 |
| 23                   | 0.615              | 0.500                     | 0.284       | 0.106 | 0.536       | 0.095 |
| 25                   | 0.368              | 0.313                     | 0.427       | 0.044 | 0.290       | 0.031 |
| 26                   | 0.421              | 0.368                     | 0.424       | 0.080 | 0.498       | 0.057 |
| 28                   | 0.375              | 0.316                     | 0.398       | 0.059 | 0.381       | 0.035 |
| 29                   | 0.316              | 0.611                     | 0.459       | 0.043 | 0.601       | 0.073 |
| 30                   | 0.350              | 0.421                     | 0.417       | 0.044 | 0.376       | 0.060 |
| 31                   | 0.235              | 0.400                     | 0.396       | 0.073 | 0.422       | 0.064 |
| 32                   | 0.900              | 0.833                     | --          |       | 0.144       | 0.133 |

## B. Growth Traits

| PopID | Height |       |        |       | Number of Leaves |      |       |      |
|-------|--------|-------|--------|-------|------------------|------|-------|------|
|       | 2003   |       | 2012   |       | 2003             |      | 2012  |      |
|       | Mean   | SE    | Mean   | SE    | Mean             | SE   | Mean  | SE   |
| 1     | 101.72 | 6.67  | 100.16 | 4.11  | 8.10             | 0.51 | 8.40  | 0.39 |
| 2     | 108.95 | 3.27  | 110.25 | 4.01  | 9.40             | 0.32 | 9.26  | 0.37 |
| 4     | 116.29 | 3.90  | 113.94 | 4.73  | 9.57             | 0.38 | 9.27  | 0.50 |
| 5     | 106.93 | 5.12  | 117.77 | 6.42  | 9.00             | 0.57 | 10.41 | 0.91 |
| 8     | 97.62  | 9.90  | 100.91 | 7.32  | 8.86             | 0.95 | 8.75  | 0.62 |
| 9     | --     |       | 98.27  | 7.82  | 8.20             | 2.15 | 8.53  | 0.73 |
| 10    | --     |       | 98.13  | 7.75  | 7.71             | 1.39 | 8.76  | 0.90 |
| 12    | 113.69 | 12.12 | 125.62 | 9.41  | 9.07             | 0.37 | 8.31  | 1.46 |
| 14    | 96.47  | 11.56 | 78.16  | 6.66  | 8.67             | 0.94 | 8.14  | 0.36 |
| 15    | 100.67 | 5.70  | --     |       | 8.00             | 0.28 | 8.17  | 0.75 |
| 16    | 99.27  | 5.80  | 101.84 | 5.96  | 8.43             | 0.40 | 8.67  | 0.37 |
| 17    | 110.73 | 7.23  | 113.08 | 6.11  | 9.85             | 0.44 | 9.00  | 0.39 |
| 19    | 108.03 | 6.24  | 103.64 | 6.63  | 10.07            | 0.69 | 9.30  | 0.55 |
| 22    | 103.48 | 5.54  | 91.41  | 5.30  | 9.12             | 0.42 | 8.19  | 0.59 |
| 25    | 106.20 | 11.22 | --     |       | 9.00             | 0.80 | 8.00  | 0.58 |
| 28    | 103.45 | 7.43  | 92.63  | 11.95 | 7.67             | 0.93 | 9.50  | 0.79 |
| 29    | 107.56 | 6.61  | 89.48  | 11.86 | 8.21             | 0.38 | 7.55  | 0.45 |
| 32    | --     |       | 74.26  | 11.28 | 6.25             | 1.89 | 7.00  | 0.88 |

**Table S6.** Variance components used to estimate  $P_{CT}$  (variance between sampling years (VC), variance attributed to populations nested within years (VP) and variation within populations (VI)) for two size (height and number of leaves) and two herbicide resistance traits measured at 1.7 kg a.i./ha glyphosate (survival and biomass). 95% lower and upper confidence limits were estimated by bootstrapping across individuals.

| Trait            | V <sub>C</sub> | V <sub>P</sub> | V <sub>I</sub> | P <sub>CT</sub> | 2.5L  | 97.5U |
|------------------|----------------|----------------|----------------|-----------------|-------|-------|
| Height           | 975.260        | 944.470        | 2682.316       | 0.276           | 0.160 | 0.573 |
| Number of Leaves | 8.174          | 7.367          | 7.881          | 0.403           | 0.000 | 0.760 |
| Survival         | 1.400          | 0.227          | 0.170          | 0.810           | 0.063 | 0.932 |
| Biomass          | 1.628          | 0.175          | 0.153          | 0.859           | 0.415 | 0.940 |
